# Supplementary material for: Energy efficient reduced graphene oxide additives: Mechanism of effective lubrication and antiwear properties
Source: PubMed Central journal article supplement (PMC4698732; doi:10.1038/srep18372), 2016-01-04
Supplement: srep18372-s1.pdf [file srep18372-s1.pdf]

# Supporting Information:

## Energy efficient reduced graphene oxide additives: Mechanism of effective lubrication and antiwear properties

Bhavana Gupta<sup>a</sup>, N. Kumar<sup>a\*</sup>, Kalpataru Panda<sup>b</sup>, S. Dash<sup>a</sup>, A.K. Tyagi<sup>a</sup>

<sup>a</sup>Indira Gandhi Centre for Atomic Research, Kalpakkam 603102, Tamilnadu, India

<sup>b</sup>Graduate School of Engineering, Osaka University, Osaka, Japan

Correspondence and requests for materials should be addressed to N.K. ([niranjan@igcar.gov.in](mailto:niranjan@igcar.gov.in), [phytribology@gmail.com](mailto:phytribology@gmail.com), Tel.: +91 44 27480500 (ext. 22537), Fax: +914427480081)

## Table of Content

- Figure S1:** Friction coefficient of steel-steel dry contact condition. Load: 500 mN, linear sliding speed: 0.5 cm/s, radius of curvature of wear track: 1 mm, Ball: 100Cr6 steel (2 mm diameter).
- Figure S2:** Concentrations of rGO vs average friction coefficient. Load: 500 mN, linear sliding speed: 0.5 cm/s, radius of curvature of wear track: 1 mm, Ball: 100Cr6 steel (2 mm diameter).
- Figure S3:** Concentrations of rGO vs wear depth. Load: 500 mN, linear sliding speed: 0.5 cm/s, radius of curvature of wear track: 1 mm, Ball: 100Cr6 steel (2 mm diameter).
- Figure S4:** The rGO concentration dependent dynamic and kinematic viscosity of PEG
- Figure S5:** Contact angle of (a) neat PEG and with various rGO concentration (b) 0.02 (c) 0.05 (d) 0.15 (e) 0.2 (e) 0.3 (g) 0.5 and (h) 1.0 mg. mL<sup>-1</sup> in PEG.
- Figure S6:** Standard deviation of friction coefficient vs. normal load in (a) 0.2 mg. mL<sup>-1</sup> rGO dispersed in PEG200 (b) neat PEG200 lubricated steel-steel contact. This plot is given on the basis of results presented in Figure 3b-c, respectively.
- Figure S7:** Load dependent wear depth in (a) neat PEG200 lubricated steel-steel contact and (b) 0.2 mg mL<sup>-1</sup> rGO dispersed in PEG200. Linear sliding speed: 0.5 cm/s, radius of curvature of wear track: 1 mm, Ball: 100Cr6 steel (2 mm diameter).
- Figure S8:** Raman mapping inside the wear track at rGO concentration (a) 0.2 and (b) 1.0 mg.mL<sup>-1</sup>, (a-g) represents typical feature of data obtained from the random position of the wear tracks. These data corresponds to the Raman mapping produced in figure 5.
- Figure S9:** Optical image of wear track (a) PEG lubricated contact (b) 0.2 mg. mL<sup>-1</sup> rGO PEG lubricated contact and (c) 1.0 mg. mL<sup>-1</sup> rGO PEG lubricated contact.
- Figure S10:** Shear stress vs. shear rate in (a) pure PEG and (b) PEG with 0.2 mg. mL<sup>-1</sup> graphene concentration

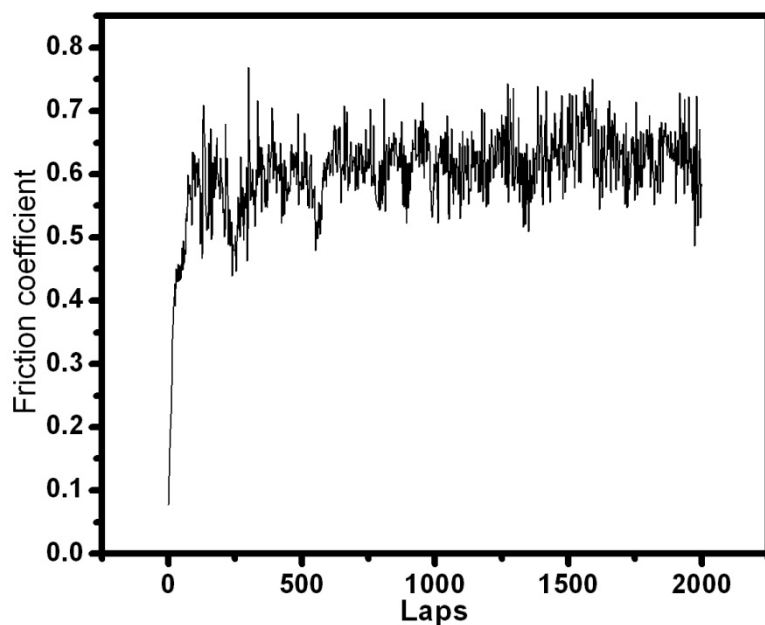

**Figure S1.** Friction coefficient of steel-steel dry contact condition. Load: 500 mN, linear sliding speed: 0.5 cm/s, radius of curvature of wear track: 1 mm, Ball: 100Cr6 steel (2 mm diameter).

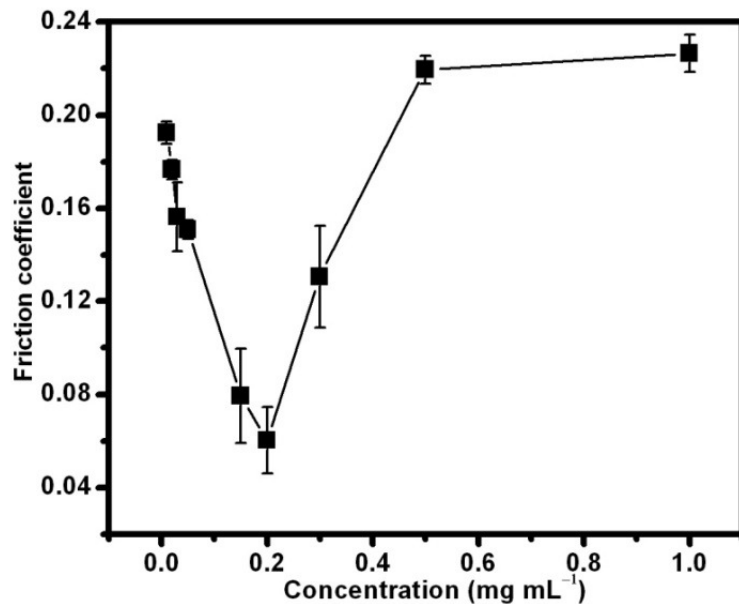

**Figure S2.** Concentrations of rGO vs average friction coefficient. Load: 500 mN, linear sliding speed: 0.5 cm/s, radius of curvature of wear track: 1 mm, Ball: 100Cr6 steel (2 mm diameter).

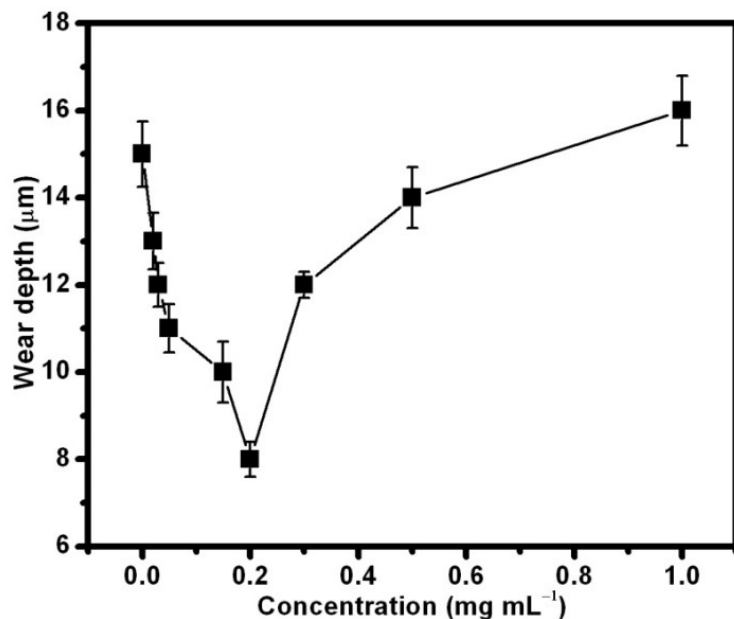

**Figure S3.** Concentrations of rGO vs wear depth. Load: 500 mN, inear sliding speed: 0.5 cm/s, radius of curvature of wear track: 1 mm, Ball: 100Cr6 steel (2 mm diameter).

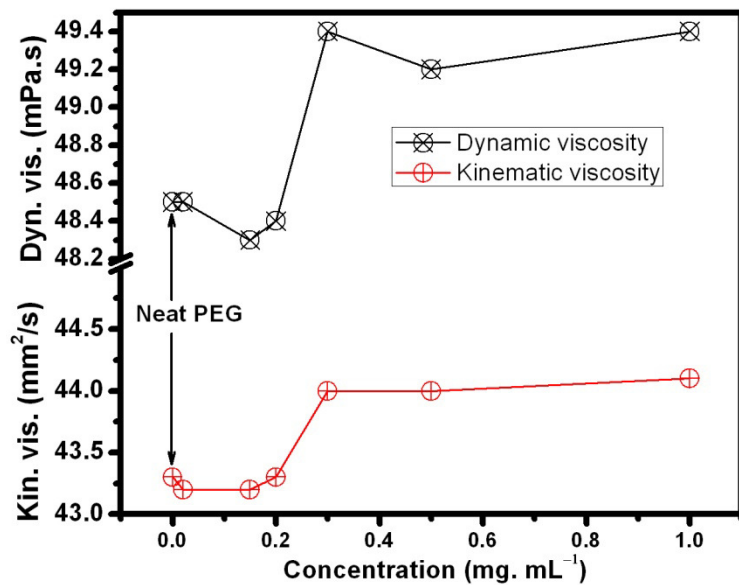

**Figure S4.** The rGO concentration dependent dynamic and kinematic viscosity of PEG

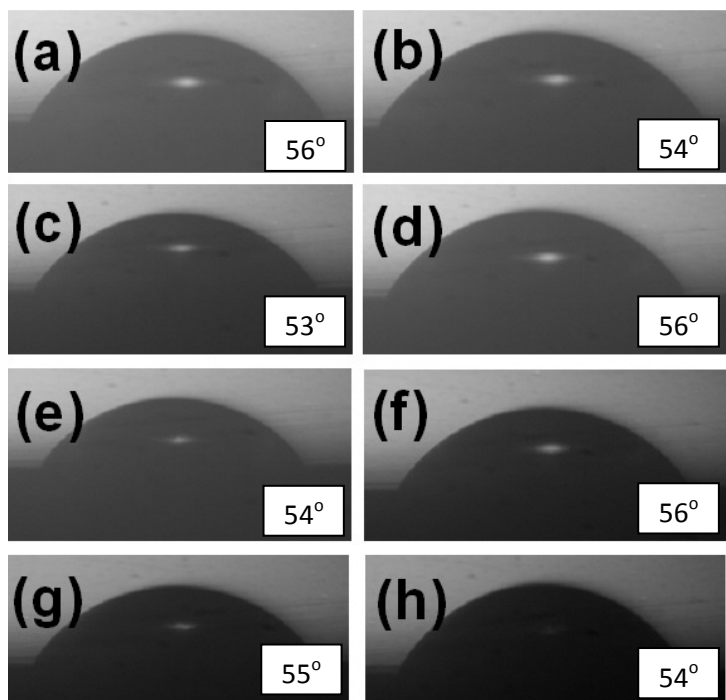

**Figure S5.** Contact angle of (a) neat PEG and with various rGO concentration (b) 0.02 (c) 0.05 (d) 0.15 (e) 0.2 (e) 0.3 (g) 0.5 and (h) 1.0 mg. mL<sup>-1</sup> in PEG.

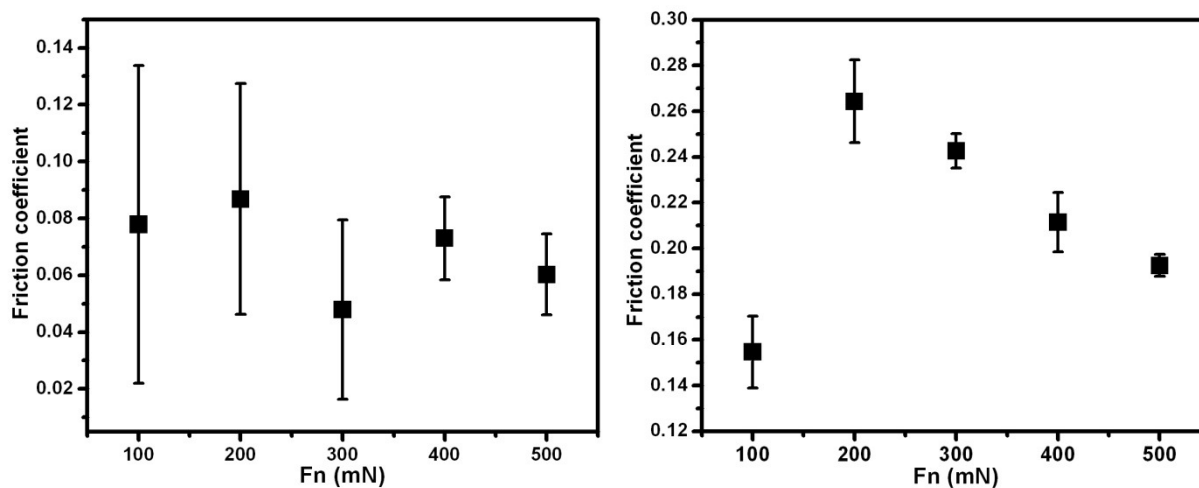

**Figure S6.** Standard deviation of friction coefficient vs. normal load in (a) 0.2 mg. mL<sup>-1</sup> rGO dispersed in PEG200 (b) neat PEG200 lubricated steel-steel contact. This plot is given on the basis of results presented in Figure 3b-c, respectively.

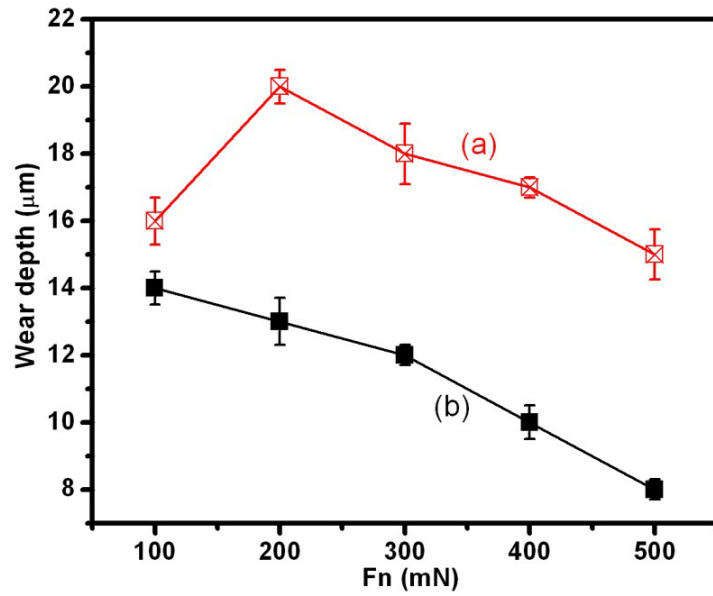

**Figure S7.** Load dependent wear depth in (a) neat PEG200 lubricated steel-steel contact and (b) 0.2 mg mL<sup>-1</sup> rGO dispersed in PEG200. Linear sliding speed: 0.5 cm/s, radius of curvature of wear track: 1 mm, Ball: 100Cr6 steel (2 mm diameter).

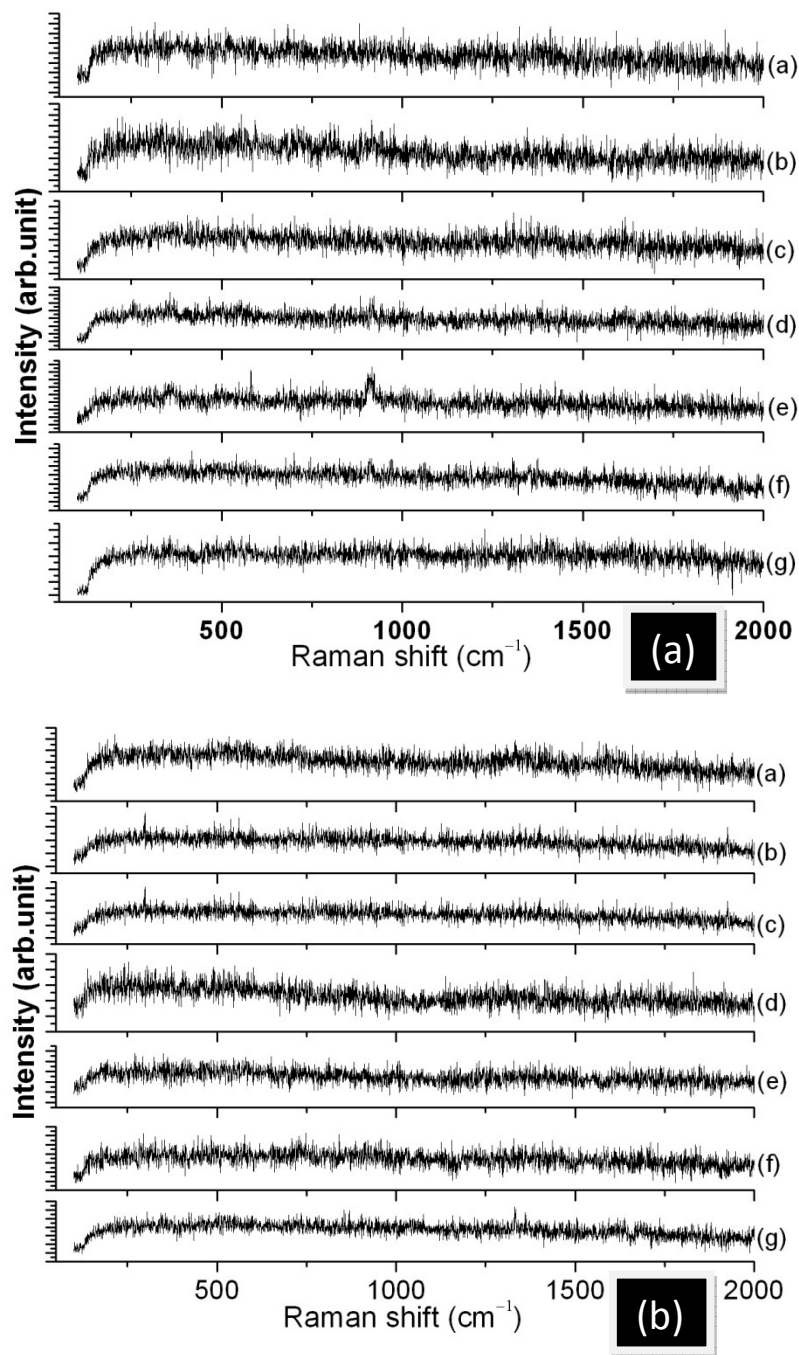

**Figure S8.** Raman mapping inside the wear track at rGO concentration (a) 0.2 and (b) 1.0 mg.mL<sup>-1</sup>, (a-g) represents typical feature of data obtained from the random position of the wear tracks. These data corresponds to the Raman mapping produced in figure 5.

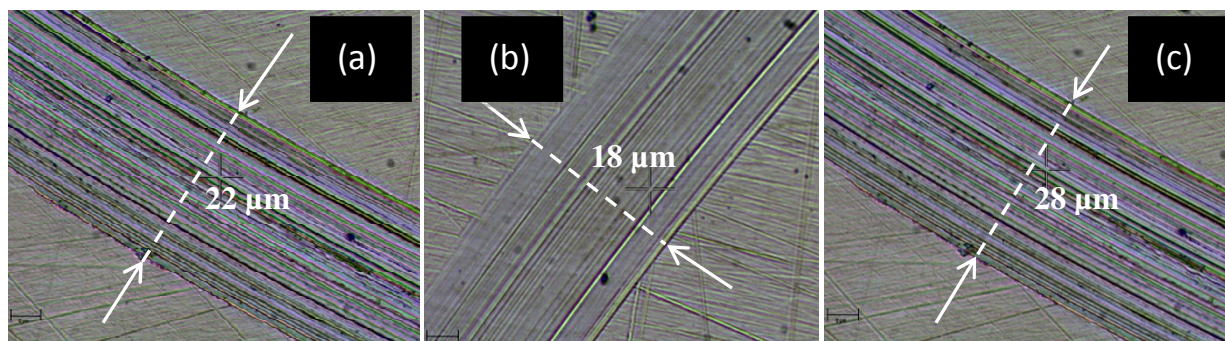

**Figure S9.** Optical image of wear track (a) PEG lubricated contact (b) 0.2 mg. mL<sup>-1</sup>rGO PEG lubricated contact and (c) 1.0 mg. mL<sup>-1</sup> rGO PEG lubricated contact.

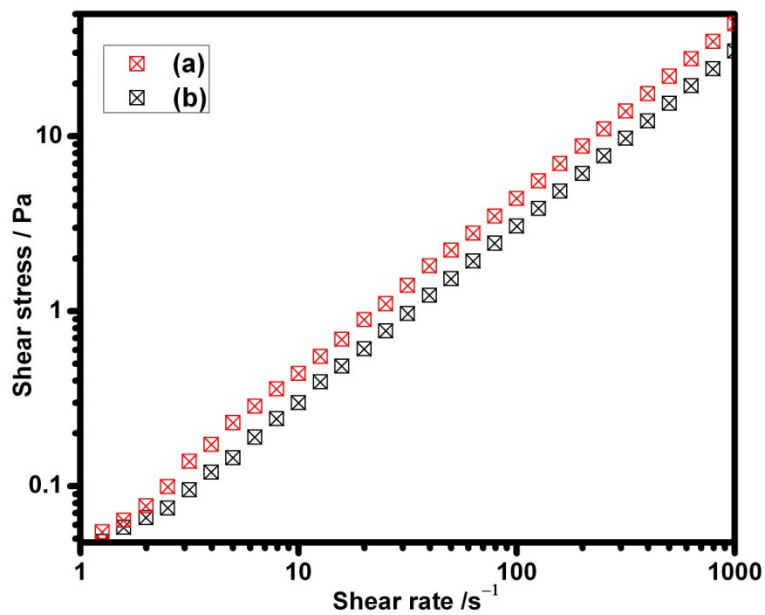

**Figure S10.** Shear stress vs. shear rate in (a) pure PEG and (b) PEG with 0.2 mg. mL<sup>-1</sup> graphene concentration
